# Supplementary material
Source: Springer Nature journal article supplement (https://www.springermedizin.de/resource/supplementary/12889_2005_386_MOESM7_ESM.pdf/9501476)

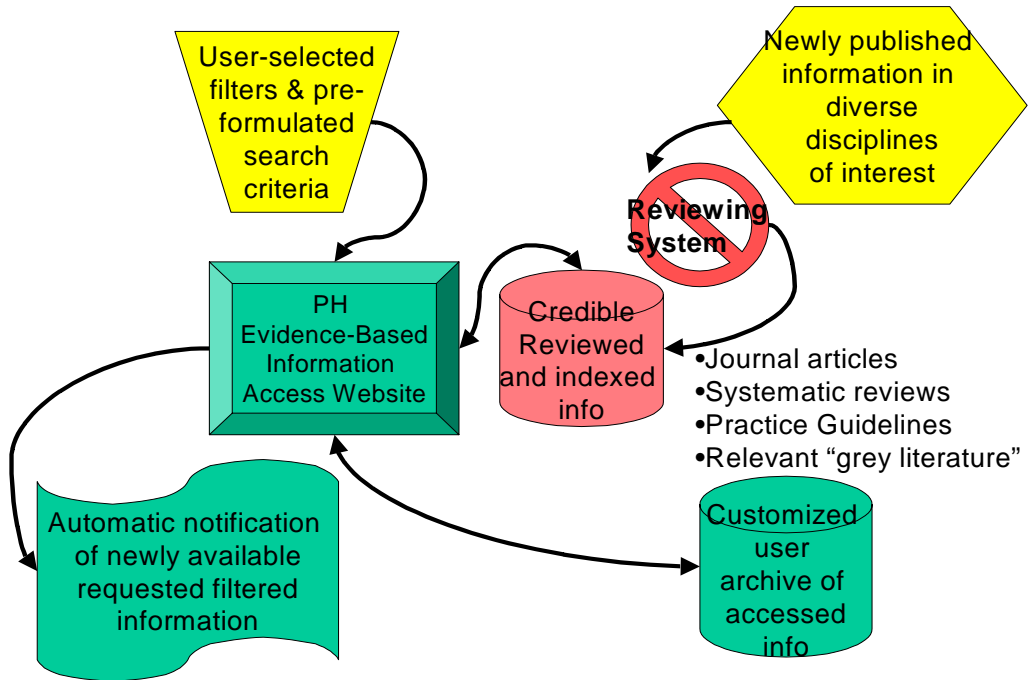

Supplement: MOESM7 [file 9501476]
